# Supplementary material for: Well-tolerated Spirulina extract inhibits influenza virus replication and reduces virus-induced mortality
Source: PubMed Central journal article supplement (PMC4828654; doi:10.1038/srep24253), 2016-04-12
Supplement: srep24253-s1.pdf [file srep24253-s1.pdf]

# **Well-tolerated Spirulina extract inhibits influenza virus replication and reduces virus-induced mortality**

**Yi-Hsiang Chen<sup>1,3</sup>, Gi-Kung Chang<sup>1</sup>, Shu-Ming Kuo<sup>1</sup>, Sheng-Yu Huang<sup>1,3</sup>,  
I-Chen Hu<sup>5</sup>, Yu-Lun Lo<sup>1</sup>, and Shin-Ru Shih<sup>1,2,3,4,\*</sup>**

<sup>1</sup>Research Centre for Emerging Viral Infections,

<sup>2</sup>Department of Medical Biotechnology and Laboratory Science, and

<sup>3</sup>Graduate Institute of Biomedical Sciences, College of Medicine, Chang Gung University,

Taoyuan, Taiwan, ROC.

<sup>4</sup>Clinical Virology Lab, Department of Clinical Pathology, Chang Gung Memorial Hospital,

Taoyuan, Taiwan, ROC.

<sup>5</sup>Institute of Bioinformatics and Structural Biology, National Tsing-Hua University, Hsinchu,

Taiwan, ROC.

\*Correspondence should be addressed to: S.R.S (email: srshih@mail.cgu.edu.tw)

## Supplementary Information

Supplementary Table S1. Hematology results in rats (Mean  $\pm$  SD, N=10)

| Parameters                      | Sex    | Dose (mg/kg/day)   |                    |                    |                    |
|---------------------------------|--------|--------------------|--------------------|--------------------|--------------------|
|                                 |        | 0                  | 750                | 1500               | 3000               |
| WBC ( $10^3/\mu\text{L}$ )      | Male   | 11.058 $\pm$ 3.260 | 11.769 $\pm$ 3.089 | 14.721 $\pm$ 3.362 | 13.434 $\pm$ 4.067 |
|                                 | Female | 11.158 $\pm$ 3.107 | 11.104 $\pm$ 3.626 | 11.387 $\pm$ 2.467 | 11.280 $\pm$ 4.141 |
| RBC ( $10^6/\mu\text{L}$ )      | Male   | 7.867 $\pm$ 0.238  | 8.066 $\pm$ 0.456  | 7.889 $\pm$ 0.375  | 7.809 $\pm$ 0.236  |
|                                 | Female | 8.447 $\pm$ 0.488  | 8.287 $\pm$ 0.585  | 8.558 $\pm$ 0.555  | 8.392 $\pm$ 0.517  |
| Hb (g/dL)                       | Male   | 14.83 $\pm$ 0.52   | 15.22 $\pm$ 0.94   | 15.19 $\pm$ 0.57   | 15.00 $\pm$ 0.57   |
|                                 | Female | 15.64 $\pm$ 0.91   | 15.47 $\pm$ 1.19   | 15.98 $\pm$ 0.78   | 15.69 $\pm$ 0.83   |
| Ht (%)                          | Male   | 46.98 $\pm$ 1.41   | 48.19 $\pm$ 2.82   | 47.80 $\pm$ 1.75   | 47.14 $\pm$ 1.83   |
|                                 | Female | 48.35 $\pm$ 2.94   | 47.64 $\pm$ 3.34   | 48.93 $\pm$ 2.34   | 48.23 $\pm$ 2.51   |
| MCV (fl)                        | Male   | 59.66 $\pm$ 0.88   | 59.76 $\pm$ 1.13   | 60.58 $\pm$ 1.01   | 60.37 $\pm$ 1.40   |
|                                 | Female | 57.24 $\pm$ 1.60   | 57.52 $\pm$ 0.88   | 57.24 $\pm$ 1.75   | 57.52 $\pm$ 1.63   |
| MCH (pg)                        | Male   | 18.86 $\pm$ 0.40   | 18.87 $\pm$ 0.41   | 19.26 $\pm$ 0.27   | 19.22 $\pm$ 0.47   |
|                                 | Female | 18.49 $\pm$ 0.50   | 18.68 $\pm$ 0.33   | 18.67 $\pm$ 0.68   | 18.71 $\pm$ 0.46   |
| MCHC (%)                        | Male   | 31.59 $\pm$ 0.46   | 31.58 $\pm$ 0.27   | 31.81 $\pm$ 0.41   | 31.81 $\pm$ 0.38   |
|                                 | Female | 32.32 $\pm$ 0.37   | 32.45 $\pm$ 0.46   | 32.63 $\pm$ 0.64   | 32.53 $\pm$ 0.46   |
| Platelet ( $10^3/\mu\text{L}$ ) | Male   | 1134.0 $\pm$ 155.0 | 1152.4 $\pm$ 156.4 | 1088.8 $\pm$ 168.8 | 1150.2 $\pm$ 147.8 |
|                                 | Female | 1219.0 $\pm$ 86.0  | 1197.0 $\pm$ 164.8 | 1244.3 $\pm$ 104.5 | 1209.2 $\pm$ 106.5 |

\*: P < 0.05

Supplementary Table S2. Serum Chemistry in rats (Mean  $\pm$  SD, N=10)

| Parameters            | Sex    | Dose (mg/kg/day)  |                   |                   |                   |
|-----------------------|--------|-------------------|-------------------|-------------------|-------------------|
|                       |        | 0                 | 750               | 1500              | 3000              |
| AST (U/L)             | Male   | 128.2 $\pm$ 40.8  | 101.3 $\pm$ 10.3* | 104.7 $\pm$ 18.3  | 102.1 $\pm$ 12.9* |
|                       | Female | 105.0 $\pm$ 51.5  | 87.5 $\pm$ 8.2*   | 90.0 $\pm$ 21.1   | 94.2 $\pm$ 16.5   |
| ALT (U/L)             | Male   | 34.0 $\pm$ 4.1    | 31.5 $\pm$ 5.1    | 30.2 $\pm$ 4.2    | 27.9 $\pm$ 4.7    |
|                       | Female | 34.8 $\pm$ 38.7   | 23.8 $\pm$ 3.1    | 23.8 $\pm$ 5.7    | 26.5 $\pm$ 5.9    |
| ALP (U/L)             | Male   | 193.6 $\pm$ 25.4  | 169.0 $\pm$ 17.5  | 169.6 $\pm$ 26.8  | 164.6 $\pm$ 38.1  |
|                       | Female | 100.1 $\pm$ 21.8  | 94.1 $\pm$ 22.3   | 98.0 $\pm$ 28.1   | 94.1 $\pm$ 19.9   |
| Total proteins (g/dL) | Male   | 6.59 $\pm$ 0.21   | 6.52 $\pm$ 0.36   | 6.47 $\pm$ 0.31   | 6.56 $\pm$ 0.35   |
|                       | Female | 7.14 $\pm$ 0.54   | 7.28 $\pm$ 0.30   | 7.37 $\pm$ 0.32   | 7.16 $\pm$ 0.24   |
| Uric acid (mg/dL)     | Male   | 2.67 $\pm$ 0.59   | 2.71 $\pm$ 0.53   | 2.68 $\pm$ 0.56   | 2.89 $\pm$ 1.02   |
|                       | Female | 2.44 $\pm$ 0.62   | 2.87 $\pm$ 0.50   | 2.35 $\pm$ 0.34   | 2.36 $\pm$ 0.45   |
| $\gamma$ GT           | Male   | 0.867 $\pm$ 0.454 | 0.767 $\pm$ 0.565 | 0.713 $\pm$ 0.635 | 0.506 $\pm$ 0.434 |
|                       | Female | 0.651 $\pm$ 0.644 | 1.083 $\pm$ 0.749 | 0.681 $\pm$ 0.500 | 0.785 $\pm$ 0.608 |
| Glucose (mg/dL)       | Male   | 146.4 $\pm$ 26.9  | 149.2 $\pm$ 24.8  | 155.5 $\pm$ 24.7  | 165.6 $\pm$ 43.4  |
|                       | Female | 143.4 $\pm$ 37.6  | 162.5 $\pm$ 38.3. | 142.2 $\pm$ 34.6  | 144.8 $\pm$ 22.5  |
| Creatinine (mg/dL)    | Male   | 0.41 $\pm$ 0.06   | 0.41 $\pm$ 0.03   | 0.42 $\pm$ 0.04   | 0.43 $\pm$ 0.05   |
|                       | Female | 0.50 $\pm$ 0.05   | 0.47 $\pm$ 0.05   | 0.49 $\pm$ 0.07   | 0.47 $\pm$ 0.07   |

\*: P&lt;0.05

Supplementary Table S3. Composition analysis of Spirulina extract

|                | Content~% (w/w) |
|----------------|-----------------|
| Protein        | 39.33 ± 5.6     |
| Polysaccharide | 11.79 ± 5.7     |
| Nucleic acid   | 19.29 ± 2.7     |
| Water          | 5 ± 1           |
| Ash            | 1.2 ± 0.3       |
| Others         | 23.39           |

Protein content determined by Bradford assay

Polysaccharide content determined by the phenol-sulfuric acid method

Nucleotide content determined by OD260 absorbance

Water content determined by the loss on drying method

Ash content determined by incineration at 600°C for 7 hrs.

---

Supplementary Table S4. Antiviral activity of the further fractionation of Spirulina extract against Flu A/WSN/33 virus

---

|                                   | <b>EC50 (mg/mL)</b> |
|-----------------------------------|---------------------|
| Spirulina extract                 | 0.955 ± 0.052       |
| Spirulina extract (> 100KD)       | 0.657 ± 0.202       |
| Spirulina extract (< 100KD)       | Not detected        |
| Spirulina extract (Ethanol prec.) | 0.602 ± 0.04        |
| Spirulina extract (DEAE)          | 0.668 ± 0.033       |
| Spirulina extract (TCA)           | 0.835 ± 0.02        |
| Spirulina extract (HWE)           | Not detected        |
| C-phycoerythrin                   | Not detected        |
| Allylphycoerythrin                | Not detected        |

---

>100KD and <100KD: Fractionized with molecular size at 100KD by “Amicon Ultra-15 Centrifugal Filter Unit with Ultracel-100 membrane;

Ethanol prec.: Fractionized with 70% ethanol precipitation;

DEAE: Fractionized with DEAE gel (Sepharose™ Fast Flow) for negative charge molecules;

TCA: 10% Trichloroacetic acid precipitation to remove protein fraction;

HWE: Hot water extraction with 99°C for 1hr. to denature proteins fraction;

EC50: 50% effective concentration, based on neutralization test;

All data represent mean ± SD for three independent experiments.
